# Supplementary material for: Spatial Variability and Temporal Trends of Climate Change in Southwest Ethiopia: Association with Farmers’ Perception and Their Adaptation Strategies
Source: Hindawi journal article supplement (doi:10.1155/2021/3863530), 2021-07-23
Supplement: f1 [file 3863530.f1.docx]

S1-Table 1: Socio-demography of household heads participated during the survey in 2019, southwest Ethiopia.

| Variable | Frequency | % |
| --- | --- | --- |
| Age |  |  |
| 40-50 | 169 | 69.0 |
| 51-69 | 69 | 28.2 |
| ≥70 | 7 | 2.9 |
| Sex |  |  |
| Male | 202 | 82.4 |
| Female | 43 | 17.6 |
| Occupation |  |  |
| Farming | 156 | 63.7 |
| Others | 89 | 36.3 |
| Education |  |  |
| Non-educated | 99 | 40.4 |
| Educated | 146 | 59.6 |
| Grade 1-4 | 55 | 37.6 |
| Grade 4-6 | 91 | 62.3 |
| Family size |  | 0.0 |
| 1-5 | 51 | 20.8 |
| 6-10 | 187 | 76.3 |
| >10 | 7 | 2.9 |
| Farming experience |  |  |
| 10-19 | 56 | 22.9 |
| 20-29 | 126 | 51.4 |
| 30-39 | 50 | 20.4 |
| 40-50 | 13 | 5.3 |
